# Supplementary material
Source: MDPI journal article supplement (https://www.mdpi.com/2077-1312/10/10/1544)
Supplement: s1 [file s1]

Supplementary File for

# Impact of Physically and Chemically Dispersed Crude Oil on the Antioxidant Defense Capacities and Non-Specific Immune Responses in Sea Cucumber (*Apostichopus japonicus*)

Xishan Li <sup>1</sup>, Yuhang Zou <sup>1,2</sup>, Hao Xuan <sup>3,\*</sup>, Wei Yang <sup>1</sup>, Guoxiang Liao <sup>2</sup>, Chengyan Wang <sup>1</sup> and Deqi Xiong <sup>1,\*</sup>

<sup>1</sup> College of Environmental Science and Engineering, Dalian Maritime University, Dalian 116026, China

<sup>2</sup> National Marine Environmental Monitoring Center, Dalian 116023, China

<sup>3</sup> Appraisal Center for Environment and Engineering, Ministry of Ecology and Environment, Beijing 100006, China

\* Correspondence: xuanhao@acee.org.cn (H.X.); xiongdaq@dlmu.edu.cn (D.X.); Tel.: +86-0411-8472-9615 (D.X.)

## Supplementary Material

**Table S1.** Contents of 16 priority PAHs ( $\Sigma$ PAHs) listed by the US Environmental Protection Agency (EPA) [1] in the physically (Low-energy water-accommodated fractions, LEWAF) and chemically (Chemically enhanced water-accommodated fractions (dispersed by GM-2 chemical dispersant), CEWAF) dispersed Oman crude oil exposure solutions.

| Number of Rings | PAH                    | PAH content ( $\mu\text{g/L}$ ) |       |
|-----------------|------------------------|---------------------------------|-------|
|                 |                        | LEWAF                           | CEWAF |
| 2-ring          | naphthalene            | 0.93                            | 1.87  |
|                 | acenaphthylene         | 0.05                            | 0.12  |
|                 | acenaphthene           | 0.17                            | 0.44  |
|                 | fluorene               | 0.15                            | 0.20  |
| 3-ring          | phenanthrene           | 0.21                            | 0.75  |
|                 | anthracene             | 0.07                            | 0.16  |
|                 | fluoranthene           | 0.07                            | 0.14  |
| 4-ring          | pyrene                 | 0.05                            | 0.18  |
|                 | benzo[a]anthracene     | 0.06                            | 0.22  |
|                 | chrysene               | 0.05                            | 0.32  |
|                 | benzo[b]fluoranthene   | 0.08                            | 0.12  |
|                 | benzo[k]fluoranthene   | 0.06                            | 0.17  |
| $\geq 5$ -ring  | benzo[a]pyrene         | 0.07                            | 0.25  |
|                 | indeno[1,2,3-cd]pyrene | 0.07                            | 0.31  |
|                 | dibenzo[a,h]anthracene | 0.11                            | 0.28  |
|                 | benzo[g,h,i]perylene   | 0.05                            | 0.15  |
| $\Sigma$ PAHs   |                        | 2.25                            | 5.68  |

**Table S2.** The water quality characteristics of the maintenance water and exposure solutions.

| Item              | Temperature<br>(°C) | Salinity<br>(‰) | pH          | Dissolved oxygen<br>(mg/L) |
|-------------------|---------------------|-----------------|-------------|----------------------------|
| Maintenance water | 16.1 ± 0.5          | 32.0 ± 0.5      | 7.15 ± 0.32 | 7.95 ± 0.21                |
| Control           | 16.1 ± 0.5          | 32.0 ± 0.5      | 7.15 ± 0.32 | 7.95 ± 0.21                |
| DISP              | 16.3 ± 0.4          | 32.1 ± 0.2      | 7.35 ± 0.27 | 7.74 ± 0.27                |
| LEWAF             | 16.5 ± 0.5          | 32.0 ± 0.4      | 7.09 ± 0.15 | 7.65 ± 0.35                |
| CEWAF             | 16.1 ± 0.6          | 32.1 ± 0.7      | 7.01 ± 0.11 | 7.57 ± 0.37                |

## References

1. EPA. Method 610: Polynuclear aromatic hydrocarbons. U.S. Environmental Protection Agency (EPA): Washington, DC, USA, 1984; p 25.
